# Supplementary material for: The effect of the Wnt pathway on the osteogenic differentiation of periodontal ligament stem cells in different environments
Source: PeerJ journal article supplement (doi:10.7717/peerj.18770), 2025-01-03

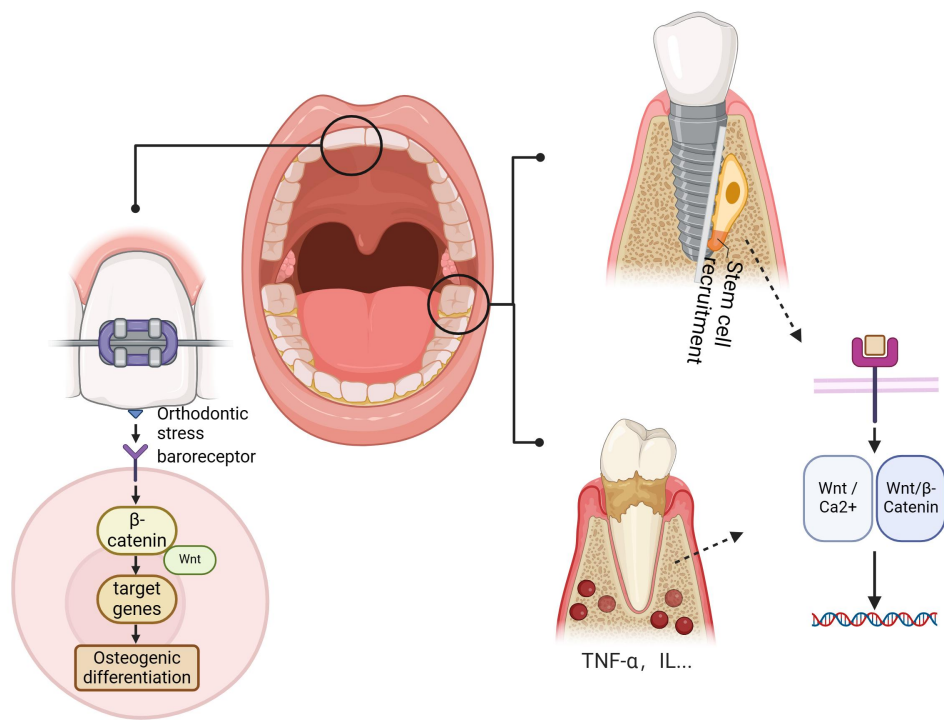

Supplement: Figure_S1.pdf [file Figure_S1.pdf]
